# Supplementary material
Source: Springer Nature journal article supplement (https://www.springermedizin.de/resource/supplementary/12985_2011_1575_MOESM1_ESM.pdf/9610088)

# rate of response

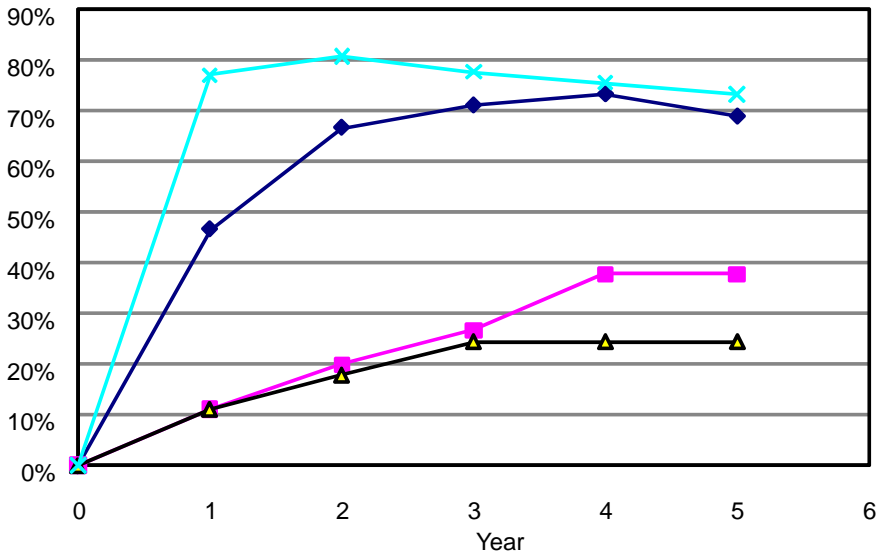

◆ HBVDNA < 300 copies/ml

■ HBeAg loss

▲ HBeAg conversion

\* ALT normalization

Supplement: MOESM1 [file 9610088]
